# Supplementary material
Source: PubMed Central journal article supplement (PMC5488719)

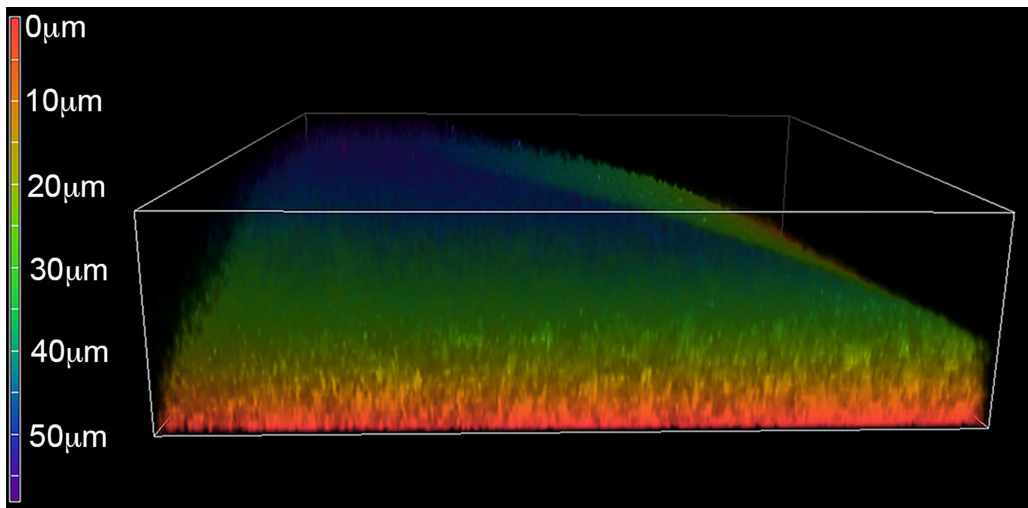

Supplement: NIHMS868744-supplement-1.pdf [file NIHMS868744-supplement-1.pdf]

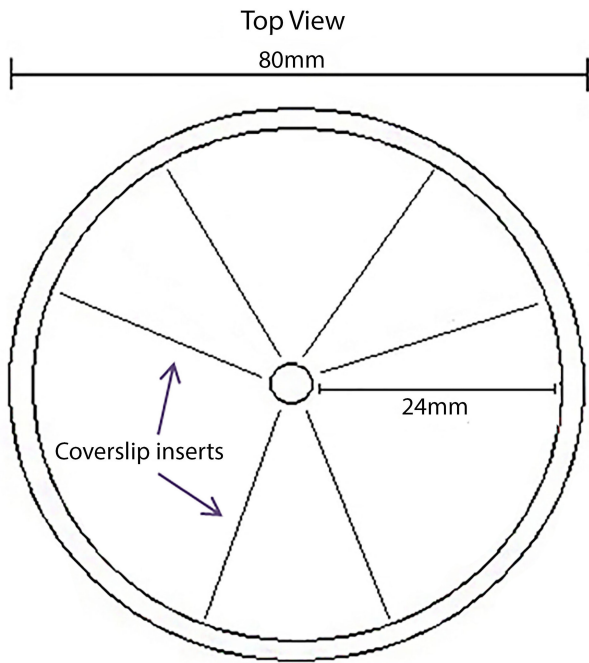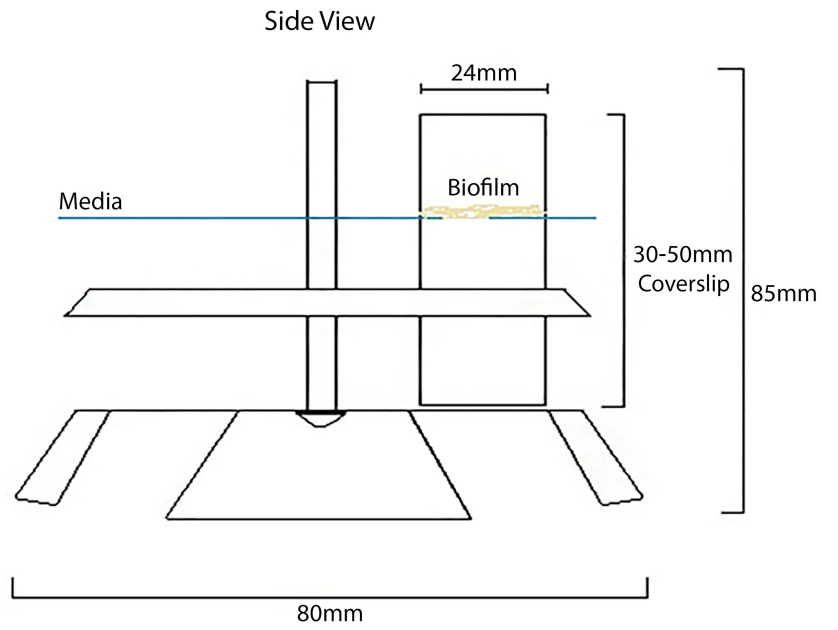

Supplement: NIHMS868744-supplement-2.pdf [file NIHMS868744-supplement-2.pdf]

Top view

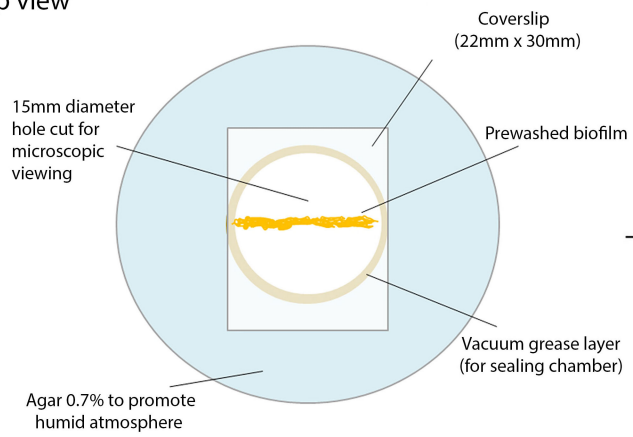

Side View

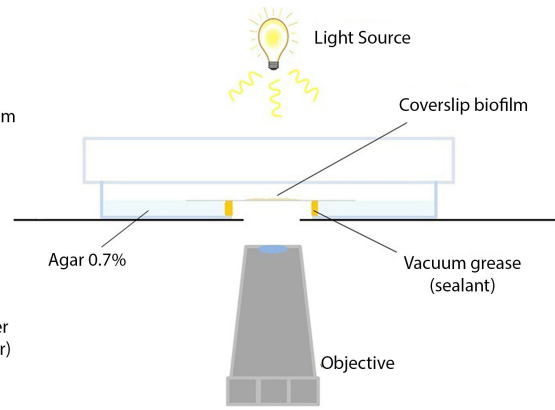

Supplement: NIHMS868744-supplement-3.pdf [file NIHMS868744-supplement-3.pdf]
